# Supplementary material
Source: PubMed Central journal article supplement (PMC3591856)
Supplement: mmc1.pdf [file mmc1.pdf]

## Supplemental Data

### ADAMTS7 Cleavage and Vascular

### Smooth Muscle Cell Migration Is Affected

### by a Coronary-Artery-Disease-Associated Variant

Xiangyuan Pu, Qingzhong Xiao, Stefan Kiechl, Kenneth Chan, Fu Liang Ng, Shivani Gor, Robin N. Poston, Changcun Fang, Ashish Patel, Ece C. Senver, Sue Shaw-Hawkins, Johann Willeit, Chuanju Liu, Jianhua Zhu, Arthur T. Tucker, Qingbo Xu, Mark J. Caulfield, and Shu Ye

## Supplemental Inventory

### 1. Supplemental Figures

Figure S1, Related to Figure 1

Figure S2

Figure S3

Figure S4

Figure S5

Figure S6

Figure S7

### 2. Supplemental References

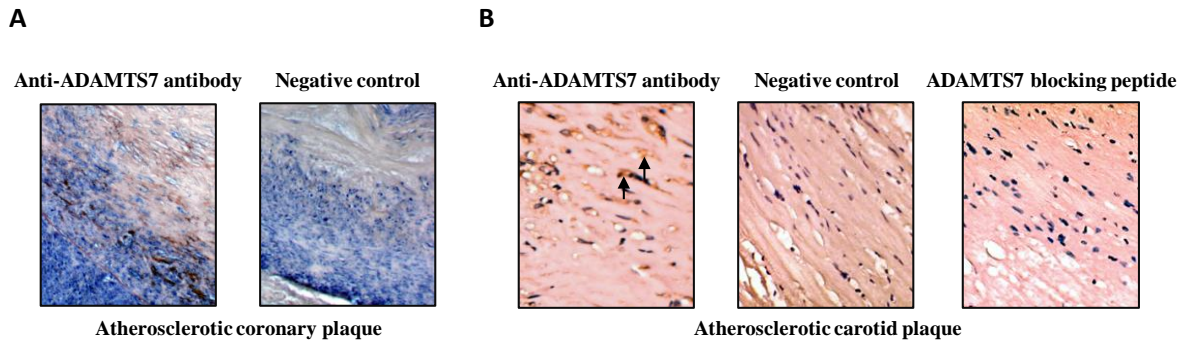

**Figure S1. ADAMTS7 Immunostaining and Controls**

(A) ADAMTS7 immunostaining (left) and negative control (with secondary antibody but no ADAMTS7 primary antibody, right) in human atherosclerotic coronary artery sections. Purple color (NBT/BCIP) indicates smooth muscle  $\alpha$ -actin staining, and dark brown color with DAB indicates ADAMTS7 staining (positive in left hand panel but negative in right hand panel).

(B) ADAMTS7 immunostaining (left), negative control (with secondary antibody but no ADAMTS7 primary antibody, middle), and blocking peptide control (with ADAMTS7 primary antibody and secondary antibody, in the presence of an ADAMTS7 blocking peptide [Abcam, ab41240]), in human atherosclerotic carotid artery sections. Arrows indicate ADAMTS7 staining (positive in left hand panel but negative in middle and right hand panels).

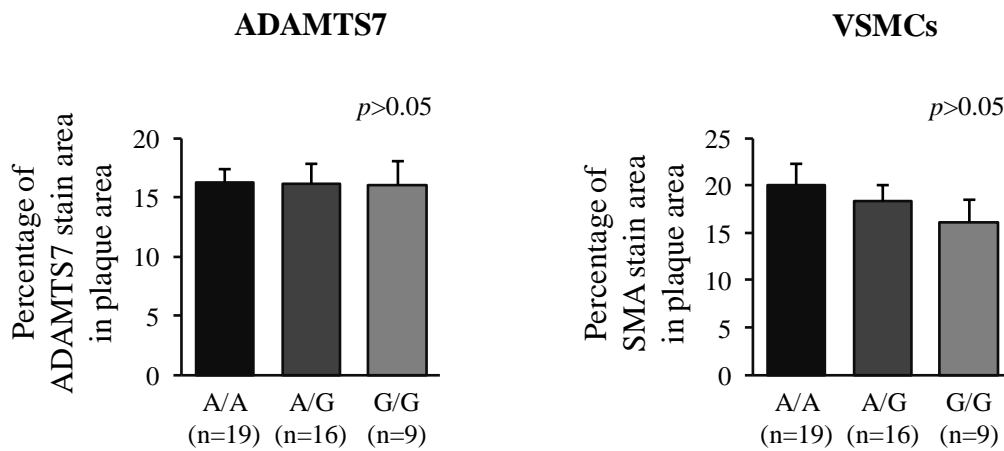

**Figure S2. Percentage of ADAMTS7 Stain Area in Plaque Area and Percentage of SMA Stain Area in Plaque Area by rs3825807 Genotypes**

Data shown are values of mean  $\pm$  standard deviation of mean.

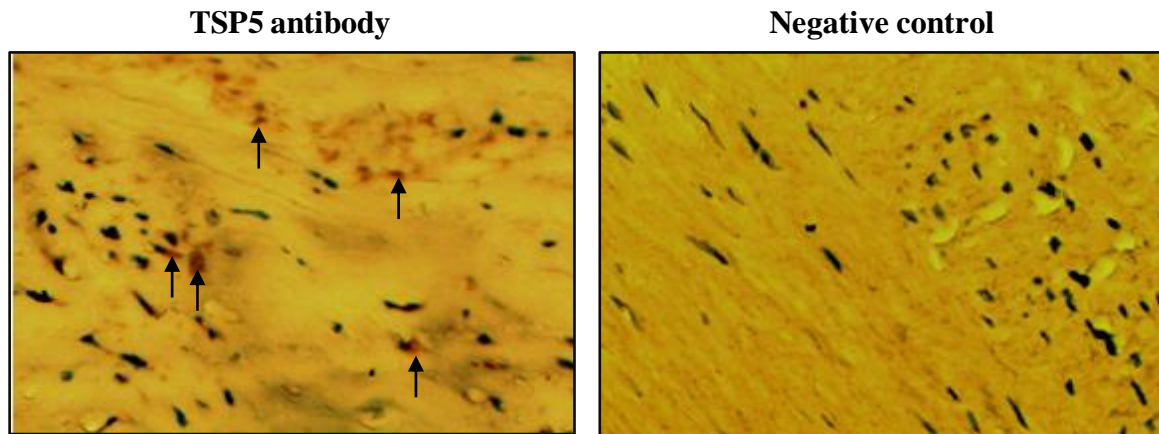

**Figure S3. TSP5 in Coronary Atherosclerotic Plaques**

Left panel: human atherosclerotic coronary artery sections were subjected to immunostaining of TSP5. Arrows indicate TSP5 staining. Right panel: negative control with secondary antibody but no TSP5 primary antibody.

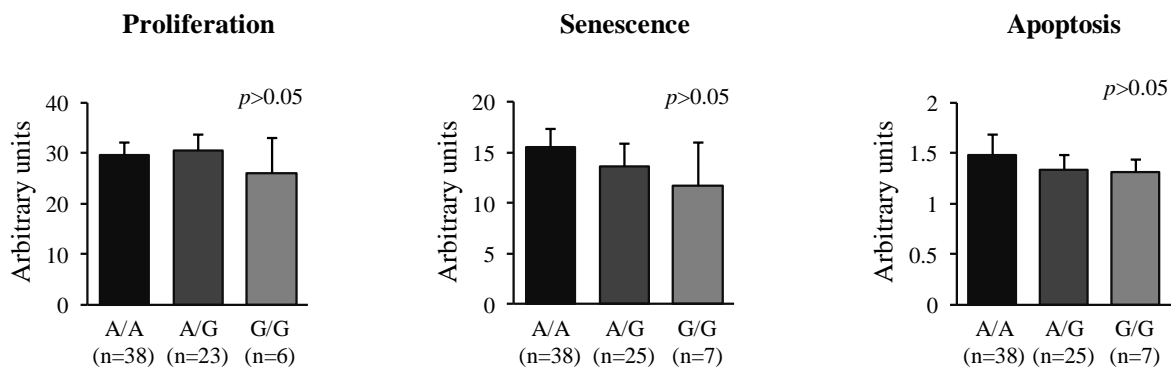

**Figure S4. Proliferation, Senescence, and Apoptosis in VSMCs by rs3825807 Genotypes**

VSMCs were seeded in duplicate in 96 well-plates (5,000 cells per well) and cultured overnight. For proliferation assay, cells were cultured for a further 12 hours in fresh medium in the presence of 10 $\mu$ M 5-bromo-2'-deoxy-uridine (BrdU), followed by BrdU detection assay with the use of 5-Bromo-2'-deoxy-uridine Labeling and Detection Kit III (Roche, 11444611001). For senescence assay, after the overnight culture, cell senescence was assessed using a 96-Well Cellular Senescence Assay Kit (Cell Biolabs Inc. CBA-231) to quantify senescence-associated beta-galactosidase activity. For apoptosis assay, after the overnight culture, cell apoptosis was measured using a Cell Death Detection ELISAPLUS kit (Roche, 11774425001) to quantify histone-complexed DNA fragments. Data shown are values of mean  $\pm$  standard deviation of mean.

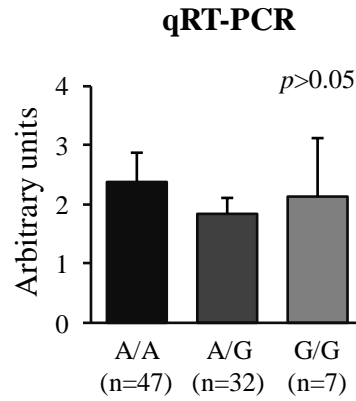

**Figure S5. Relative *ADAMTS* Expression Levels in VSMCs by rs3825807 Genotypes**

Total RNA samples were prepared from primary cultures of VSMCs, with the use of the SV Total RNA Isolation System (Promega). RNA was reverse transcribed into cDNA using random primers and M-MLV reverse transcriptase, followed by real-time PCR of *ADAMTS7* and the housekeeping gene  *$\beta$ -actin*, with TaqMan gene expression assays (Applied Biosystems, Hs00276223\_ml and Hs03023943\_g1, respectively). The  $\Delta\Delta$ CT method was used to analyze the data, with  *$\beta$ -actin* as the reference gene. Data shown are values of mean  $\pm$  standard error of mean.

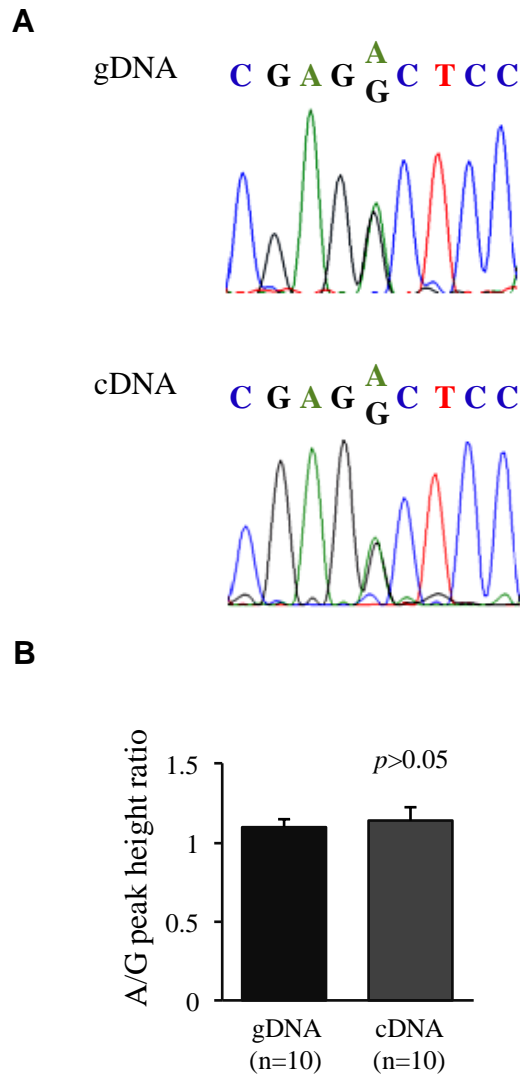

**Figure S6. Allelic Expression Imbalance Analysis of *ADAMTS7* rs3825807**

Genomic DNA (gDNA) and RNA were isolated from VSMCs that were heterozygous for rs3825807. RNA was reverse transcribed to complement DNA (cDNA). PCR to amplify the region encompassing the site of rs3825807 was carried out using gDNA and cDNA respectively as templates, and the PCR products were subjected to fluorescent dideoxy sequencing (primer sequence: 5'-CCATGTTTCATGATGGTCAGC-3'). Sequencing chromatograms were analyzed using the PeakPicker program<sup>1</sup> which calculated relative peak heights of the A and G nucleotides at the SNP site in the chromatograms deriving from cDNA and gDNA respectively, standardized against reference peaks in flanking sequences. Mann-Whitney test was performed to test a difference between the ratio of standardized A nucleotide peak height over standardized G nucleotide peak height from cDNA and the corresponding ratio from gDNA.

(A) Chromatograms from gDNA and cDNA, respectively.

(B) Schematic representation of mean (and standard error of mean) of the A/G ratios for gDNA and cDNA.

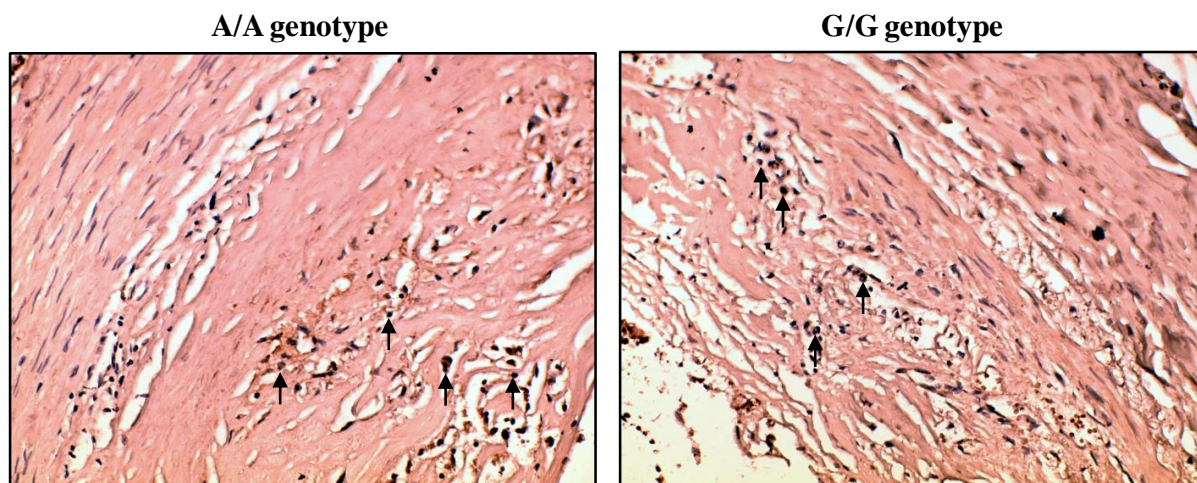

**Figure S7. CD68-Positive Cells in Atherosclerotic Coronary Plaques**

Human atherosclerotic coronary artery sections were subjected to immunostaining of CD68. Arrows indicate CD68-positive cells. Images shown are representatives of images from 3 individuals of the A/A genotype and 3 individuals of the G/G genotype examined. No apparent difference in the abundance of CD68 positive cells was observed between the A/A and G/G genotypes.

**Supplemental References**

1. Ge B, Gurd S, Gaudin T, Dore C, Lepage P, Harmsen E, Hudson TJ, Pastinen T. Survey of allelic expression using EST mining. *Genome Res* 2005;15:1584-91.
